# Supplementary material for: The dicarbonylation of indoles via Friedel–Crafts reaction with dicarbonyl nitrile generated in situ and retro-cyanohydrination
Source: Royal Society of Chemistry journal article supplement (doi:10.1039/c6ra04016k), 2016-01-01
Supplement: c6ra04016k1.pdf [file c6ra04016k1.pdf]

---

# The dicarbonylation of indoles via Friedel-Crafts reaction with dicarbonyl nitrile generated in situ and retro cyanohydration

Jianwei Yan<sup>a,b,\*</sup>, Guangjie He<sup>c</sup>, Fulin Yan<sup>b</sup>, Jixia Zhang<sup>b</sup>, Guisheng Zhang<sup>a,\*</sup>

<sup>a</sup> Collaborative Innovation Center of Henan Province for Green Manufacturing of Fine Chemicals, Key Laboratory of Green Chemical Media and Reactions, Ministry of Education, School of Chemistry and Chemical Engineering, Henan Normal University, Xinxiang, Henan 453007, PR China;

<sup>b</sup> School of Pharmacy, Xinxiang Medical University, Xinxiang, Henan 453003, P. R. China;

<sup>c</sup> Department of Forensic Medicine, Xinxiang Medical University, Xinxiang, Henan 453003, P. R. China.

E-mail: jwyansimm@163.com; zgs6668@yahoo.com.

## Supporting Information

### List of contents

|                                                                             |               |
|-----------------------------------------------------------------------------|---------------|
| <b>1. General considerations</b>                                            | <b>S2</b>     |
| <b>2. Reference for known compounds</b>                                     | <b>S2</b>     |
| <b>3. Characterization data of compounds 3aa-3al, 4ba-4oa, and 5</b>        | <b>3-10</b>   |
| <b>4. <sup>1</sup>H and <sup>13</sup>C NMR Spectra of all new compounds</b> | <b>S11-21</b> |

## 1. General considerations

All  $^1\text{H}$  NMR and  $^{13}\text{C}$  NMR spectra were measured in  $\text{CDCl}_3$ , acetone- $\text{D}_6$  or DMSO- $\text{D}_6$  using a Bruker ASCEND 400 spectrometer. Chemical shifts are expressed in ppm and  $J$  values are given in Hz. High resolution mass spectra were recorded on Bruker micrOTOF-QIII MS (ESI). IR spectra were recorded on a Bio-Rad FTS-40 spectrometer. Column chromatography was performed with 200-300 mesh silica gel using flash column techniques. Melting points (uncorrected) were determined on a Yalixien X-4 melting point apparatus. All the solvents and reagents were used directly as obtained commercially unless otherwise noted.

Procedure for the synthesis of **3aa**. A solution of indole (**1a**) (58.6 mg, 0.5 mmol), benzoylacetonitrile (**2a**) (108.8 mg, 0.75 mmol), 4-oxo-TEMPO (255 mg, 1.5 mmol) and  $\text{CuCl}$  (5 mg, 0.05 mmol) in acetic acid (5.0 mL) under an air atmosphere was stirred at room temperature for 2 h (complete consumption of indicated by TLC). The mixture was then concentrated in vacuo to give a residue that was dissolved in ethyl acetate (50 mL). Washing the ethyl acetate solution with aqueous  $\text{NaHCO}_3$  ( $2 \times 30$  mL) followed by drying over sodium sulphate and concentration in vacuo gave a residue that was subjected to flash chromatography on silica gel (petroleum ether/ethyl acetate = 3:1 as an eluent) to afford **3aa** as a yellow solid (87%).

## 2. Reference for known compounds

Some of the products are reported by other groups (**3aa**<sup>1</sup>, **3ad**<sup>1</sup>, **3ae**<sup>1</sup>, **3af**<sup>1</sup>, **3ag**<sup>1</sup>, **3al**<sup>2</sup>, **4ba**<sup>1</sup>, **4ca**<sup>3</sup>, **4da**<sup>1</sup>, **4ea**<sup>1</sup>, **4fa**<sup>3</sup>, **4ma**<sup>1</sup>, **4na**<sup>1</sup> and **4oa**<sup>1</sup>). The  $^1\text{H}$ ,  $^{13}\text{C}$  NMR and HRMS of these products were provided.

1. J.-C. Wu, R.-J. Song, Z.-Q. Wang, X.-C. Huang, Y.-X. Xie, J.-H. Li, *Angewandte Chemie International Edition* **2012**, *51*, 3453-3457.
2. I. T. Hogan, M. Sainsbury, *Tetrahedron* **1984**, *40*, 681-682.
3. R.-Y. Tang, X.-K. Guo, J.-N. Xiang, J.-H. Li, *The Journal of Organic Chemistry* **2013**, *78*, 11163-11171.

### 3. Characterization data of compounds 3aa-3al, 4ba-4oa, and 5

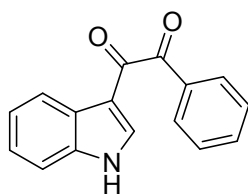

#### 1-(1H-indol-3-yl)-2-phenylethane-1,2-dione (3aa)

$^1\text{H}$  NMR (400 MHz, Acetone- $\text{D}_6$ )  $\delta$  11.38 (s, 1H), 8.41 – 8.34 (m, 1H), 8.13 (d,  $J$  = 3.2 Hz, 1H), 8.06 (dt,  $J$  = 8.5, 1.5 Hz, 2H), 7.75 – 7.68 (m, 1H), 7.64 – 7.54 (m, 3H), 7.37 – 7.30 (m, 2H);  $^{13}\text{C}$  NMR (101 MHz, Acetone- $\text{D}_6$ )  $\delta$  194.7, 189.5, 138.1, 137.8, 135.2, 134.5, 130.7, 129.8, 126.5, 124.8, 123.7, 122.6, 114.4, 113.3; HRMS calcd for  $\text{C}_{16}\text{H}_{11}\text{NO}_2\text{Na}$  ( $\text{M}+\text{Na}$ ) $^+$  272.0682, found 272.0683.

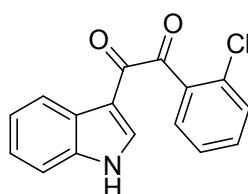

#### 1-(2-chlorophenyl)-2-(1H-indol-3-yl)ethane-1,2-dione (3ab)

Yellow solid: m.p. 202-203 °C; IR ( $\text{cm}^{-1}$ ) 1698, 1666, 1602, 1581, 1517;  $^1\text{H}$  NMR (400 MHz,  $\text{DMSO-}d_6$ )  $\delta$  12.45 (s, 1H), 8.36 (d,  $J$  = 3.2 Hz, 1H), 8.21 – 8.13 (m, 1H), 7.81 (dd,  $J$  = 7.6, 1.5 Hz, 1H), 7.67 (td,  $J$  = 7.8, 1.6 Hz, 1H), 7.62 – 7.49 (m, 3H), 7.35 – 7.25 (m, 2H);  $^{13}\text{C}$  NMR (101 MHz,  $\text{DMSO-}d_6$ )  $\delta$  193.3, 185.8, 138.0, 136.9, 134.4, 134.3, 132.1, 132.0, 130.5, 127.7, 125.5, 123.8, 122.8, 121.2, 112.8, 111.8; HRMS calcd for  $\text{C}_{16}\text{H}_{10}\text{ClNO}_2\text{Na}$  ( $\text{M}+\text{Na}$ ) $^+$  306.0292, found 306.0295.

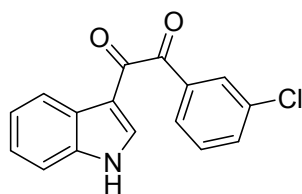

#### 1-(3-chlorophenyl)-2-(1H-indol-3-yl)ethane-1,2-dione (3ac)

Yellow solid: m.p. 203-204 °C; IR ( $\text{cm}^{-1}$ ) 1671, 1603, 1584, 1516;  $^1\text{H}$  NMR (400 MHz,  $\text{DMSO-}d_6$ )  $\delta$  12.48 (s, 1H), 8.24 (s, 2H), 7.95 (s, 1H), 7.92 (d,  $J$  = 7.6 Hz, 1H), 7.82 (d,  $J$  = 7.6 Hz, 1H), 7.63 (t,  $J$  = 7.8 Hz, 1H), 7.56 (d,  $J$  = 4.7 Hz, 1H), 7.37 – 7.27 (m, 2H);  $^{13}\text{C}$  NMR (101 MHz,  $\text{DMSO-}d_6$ )  $\delta$  192.3, 187.3, 138.5, 137.0, 134.8, 134.3, 133.9, 131.2, 128.8, 128.76, 125.1, 124.0, 123.0, 121.2, 112.8, 112.4; HRMS calcd for  $\text{C}_{16}\text{H}_{10}\text{ClNO}_2\text{Na}$  ( $\text{M}+\text{Na}$ ) $^+$  306.0292, found 306.0296.

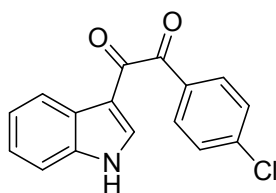

**1-(4-chlorophenyl)-2-(1H-indol-3-yl)ethane-1,2-dione (3ad)**

$^1\text{H}$  NMR (400 MHz, DMSO- $\text{D}_6$ )  $\delta$  12.45 (s, 1H), 8.22 (t,  $J = 4.9$  Hz, 2H), 7.98 (d,  $J = 8.5$  Hz, 2H), 7.67 (d,  $J = 8.4$  Hz, 2H), 7.59 – 7.52 (m, 1H), 7.36 – 7.27 (m, 2H);  $^{13}\text{C}$  NMR (101 MHz, DMSO- $\text{D}_6$ )  $\delta$  192.6, 187.8, 139.6, 138.3, 137.0, 131.7, 131.6, 129.3, 125.0, 123.9, 122.9, 121.2, 112.8, 112.4; HRMS calcd for  $\text{C}_{16}\text{H}_{10}\text{NCINaO}_2$  ( $\text{M}+\text{Na}$ ) $^+$  306.0292, found 306.0300.

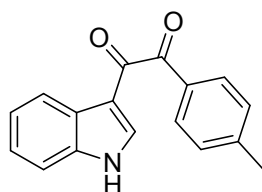

**1-(1H-indol-3-yl)-2-(p-tolyl)ethane-1,2-dione (3ae)**

$^1\text{H}$  NMR (400 MHz, DMSO- $\text{D}_6$ )  $\delta$  12.40 (s, 1H), 8.26 – 8.18 (m, 1H), 8.15 (s, 1H), 7.86 (d,  $J = 8.1$  Hz, 2H), 7.59 – 7.51 (m, 1H), 7.40 (d,  $J = 8.0$  Hz, 2H), 7.31 (p,  $J = 6.5$  Hz, 2H), 2.40 (s, 3H);  $^{13}\text{C}$  NMR (101 MHz, DMSO- $\text{D}_6$ )  $\delta$  193.7, 188.9, 145.5, 137.8, 137.0, 130.5, 129.9, 129.7, 125.0, 123.8, 122.8, 121.2, 112.8, 112.6, 21.4; HRMS calcd for  $\text{C}_{17}\text{H}_{13}\text{NNaO}_2$  ( $\text{M}+\text{Na}$ ) $^+$  286.0838, found 286.0843.

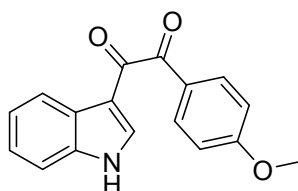

**1-(1H-indol-3-yl)-2-(4-methoxyphenyl)ethane-1,2-dione (3af)**

$^1\text{H}$  NMR (400 MHz, DMSO- $\text{D}_6$ )  $\delta$  12.36 (s, 1H), 8.25 – 8.16 (m, 1H), 8.12 (s, 1H), 7.97 – 7.88 (m, 2H), 7.59 – 7.50 (m, 1H), 7.30 (dt,  $J = 6.7, 3.6$  Hz, 2H), 7.16 – 7.06 (m, 2H), 3.86 (s, 3H);  $^{13}\text{C}$  NMR (101 MHz, DMSO- $\text{D}_6$ )  $\delta$  192.7, 189.2, 164.4, 137.7, 137.0, 132.3, 125.8, 125.1, 123.8, 122.8, 121.2, 114.6, 112.8, 55.8; HRMS calcd for  $\text{C}_{17}\text{H}_{13}\text{NNaO}_3$  ( $\text{M}+\text{Na}$ ) $^+$  302.0788, found 302.0793.

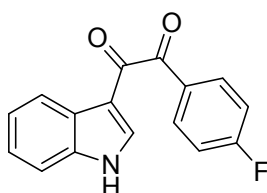

### 1-(4-fluorophenyl)-2-(1H-indol-3-yl)ethane-1,2-dione (3ag)

<sup>1</sup>H NMR (400 MHz, Acetone-D<sub>6</sub>) δ 11.41 (s, 1H), 8.42 – 8.33 (m, 1H), 8.22 – 8.07 (m, 3H), 7.66 – 7.56 (m, 1H), 7.43 – 7.25 (m, 4H); <sup>13</sup>C NMR (101 MHz, Acetone-D<sub>6</sub>) δ 193.0, 189.0, 167.2 (d, *J* = 254.2 Hz), 138.0, 133.8 (d, *J* = 9.8 Hz), 131.2 (d, *J* = 2.9 Hz), 126.5, 124.9, 123.7, 122.6, 116.8 (d, *J* = 22.3 Hz), 114.3, 113.3; HRMS calcd for C<sub>16</sub>H<sub>10</sub>FNO<sub>2</sub>Na (M+Na)<sup>+</sup> 290.0588, found 290.0587.

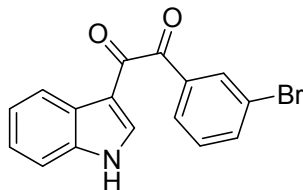

### 1-(3-bromophenyl)-2-(1H-indol-3-yl)ethane-1,2-dione (3ah)

Yellow solid: m.p. 187-188 °C; IR (cm<sup>-1</sup>) 1670, 1600, 1583, 1516; <sup>1</sup>H NMR (400 MHz, DMSO-D<sub>6</sub>) δ 12.48 (s, 1H), 8.23 (dd, *J* = 8.6, 3.7 Hz, 2H), 8.09 (t, *J* = 1.7 Hz, 1H), 7.96 (dd, *J* = 7.9, 1.8 Hz, 2H), 7.59 – 7.54 (m, 2H), 7.35 – 7.30 (m, 2H); <sup>13</sup>C NMR (101 MHz, DMSO-D<sub>6</sub>) δ 192.2, 187.3, 138.5, 137.2, 137.9, 135.0, 131.7, 131.4, 129.0, 125.0, 123.9, 122.9, 122.3, 121.2, 112.8, 112.4; HRMS calcd for C<sub>16</sub>H<sub>10</sub>BrNO<sub>2</sub>Na (M+Na)<sup>+</sup> 349.9787, found 349.9792.

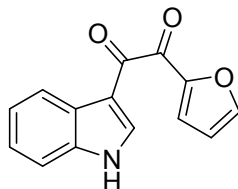

### 1-(thiophen-2-yl)-2-(1H-indol-3-yl)ethane-1,2-dione (3aj)

Yellow solid: m.p. 202-203 °C; IR (cm<sup>-1</sup>) 1670, 1655, 1599, 1516; <sup>1</sup>H NMR (400 MHz, DMSO-D<sub>6</sub>) δ 12.42 (s, 1H), 8.29 (d, *J* = 3.2 Hz, 1H), 8.25 – 8.16 (m, 2H), 7.56 (ddd, *J* = 7.7, 6.1, 3.4 Hz, 2H), 7.36 – 7.25 (m, 2H), 6.81 (dd, *J* = 3.6, 1.6 Hz, 1H); <sup>13</sup>C NMR (101 MHz, DMSO-D<sub>6</sub>) δ 185.8, 180.6, 150.1, 149.5, 138.2, 136.9, 125.4, 123.9, 123.7, 122.8, 121.3, 113.3, 112.8, 112.0; HRMS calcd for C<sub>14</sub>H<sub>9</sub>NO<sub>3</sub>Na (M+Na)<sup>+</sup> 262.0475, found 262.0480.

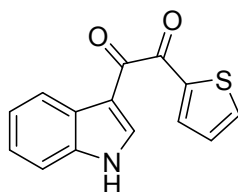

### 1-(1H-indol-3-yl)-2-(thiophen-2-yl)ethane-1,2-dione (3aj)

Yellow solid: m.p. 207-208 °C; IR (cm<sup>-1</sup>) 1670, 1645, 1599, 1516; <sup>1</sup>H NMR (400 MHz, DMSO-D<sub>6</sub>) δ 12.44 (s, 1H), 8.33 (s, 1H), 8.23 (dd, *J* = 10.6, 5.1 Hz, 2H), 7.96 (d, *J* = 3.3 Hz, 1H), 7.59 – 7.51 (m, 1H), 7.36 – 7.25 (m, 3H); <sup>13</sup>C NMR (101 MHz, DMSO) δ 185.9, 185.4, 139.0, 138.4, 137.9, 136.9, 136.9, 129.2, 125.5, 123.9, 122.9, 121.3, 112.8, 111.9; HRMS calcd for C<sub>14</sub>H<sub>9</sub>NO<sub>2</sub>SNa (M+Na)<sup>+</sup> 278.0246, found 278.0250.

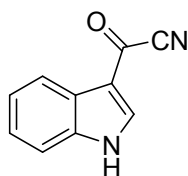

### 1H-indole-3-carbonyl cyanide (3am)

<sup>1</sup>H NMR (400 MHz, DMSO-D<sub>6</sub>) δ 12.91 (s, 1H), 8.63 (s, 1H), 8.04 (d, *J* = 7.2 Hz, 1H), 7.58 (d, *J* = 7.5 Hz, 1H), 7.41 – 7.27 (m, 2H); <sup>13</sup>C NMR (101 MHz, CDCl<sub>3</sub>) δ 158.6, 141.4, 137.6, 124.9, 124.2, 123.8, 121.0, 116.2, 114.4, 113.3; HRMS calcd for C<sub>10</sub>H<sub>6</sub>N<sub>2</sub>NaO (M+Na)<sup>+</sup> 193.0372, found 193.0381.

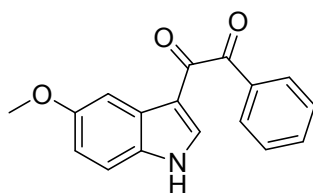

### 1-(5-methoxy-1H-indol-3-yl)-2-phenylethane-1,2-dione (4ba)

<sup>1</sup>H NMR (400 MHz, DMSO-D<sub>6</sub>) δ 12.31 (s, 1H), 8.09 (d, *J* = 2.6 Hz, 1H), 7.97 (d, *J* = 7.4 Hz, 2H), 7.78 – 7.70 (m, 2H), 7.60 (t, *J* = 7.7 Hz, 2H), 7.46 (d, *J* = 8.8 Hz, 1H), 6.95 (dd, *J* = 8.8, 2.5 Hz, 1H), 3.83 (s, 3H); <sup>13</sup>C NMR (101 MHz, DMSO-D<sub>6</sub>) δ 194.0, 188.4, 156.2, 137.9, 134.7, 133.0, 131.7, 129.7, 129.1, 126.0, 113.6, 113.6, 112.5, 103.0, 55.4; HRMS calcd for C<sub>17</sub>H<sub>13</sub>NNaO<sub>3</sub> (M+Na)<sup>+</sup> 302.0788, found 302.0796.

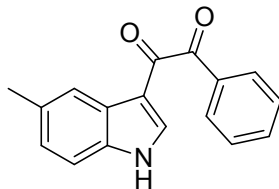

### 1-(5-methyl-1H-indol-3-yl)-2-phenylethane-1,2-dione (4ca)

<sup>1</sup>H NMR (400 MHz, DMSO-D<sub>6</sub>) δ 12.31 (s, 1H), 8.10 (d, *J* = 3.3 Hz, 1H), 8.05 (s, 1H), 7.96 (d, *J* = 7.3 Hz, 2H), 7.74 (t, *J* = 7.4 Hz, 1H), 7.59 (t, *J* = 7.7 Hz, 2H), 7.43 (d, *J* = 8.3 Hz, 1H), 7.14 (d, *J* = 8.3 Hz, 1H), 2.45 (s, 3H); <sup>13</sup>C NMR (101 MHz, DMSO-D<sub>6</sub>) δ 194.0, 188.5, 137.9, 135.3, 134.6, 133.0, 131.9, 129.7, 129.1, 125.3,

121.0, 112.4, 112.2, 21.3; HRMS calcd for C<sub>17</sub>H<sub>13</sub>NNaO<sub>2</sub> (M+Na)<sup>+</sup> 286.0838, found 286.0846.

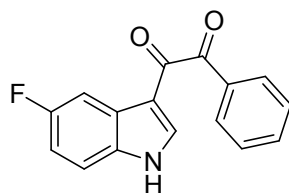

**1-(5-fluoro-1H-indol-3-yl)-2-phenylethane-1,2-dione (4da)**

<sup>1</sup>H NMR (400 MHz, Acetone-D<sub>6</sub>) δ 11.46 (s, 1H), 8.20 (s, 1H), 8.07 – 8.01 (m, 3H), 7.75 – 7.70 (m, 1H), 7.65 – 7.56 (m, 3H), 7.14 (td, *J* = 9.1, 2.6 Hz, 1H); <sup>13</sup>C NMR (101 MHz, Acetone-D<sub>6</sub>) δ 194.4, 189.2, 160.6 (d, *J* = 236.5 Hz), 139.1, 139.0 (d, *J* = 17.6 Hz), 135.3, 134.5 (d, *J* = 18.5 Hz), 130.8, 129.8, 127.3 (d, *J* = 11.2 Hz), 114.6 (d, *J* = 9.8 Hz), 114.5 (d, *J* = 4.4 Hz), 113.0 (d, *J* = 26.2 Hz), 107.6 (d, *J* = 25.1 Hz); HRMS calcd for C<sub>16</sub>H<sub>10</sub>FNO<sub>2</sub>Na (M+Na)<sup>+</sup> 290.0588, found 290.0590.

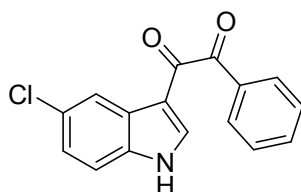

**1-(5-chloro-1H-indol-3-yl)-2-phenylethane-1,2-dione (4ea)**

<sup>1</sup>H NMR (400 MHz, Acetone-D<sub>6</sub>) δ 11.51 (s, 1H), 8.37 (d, *J* = 2.0 Hz, 1H), 8.20 (s, 1H), 8.09 – 8.03 (m, 2H), 7.73 (t, *J* = 7.4 Hz, 1H), 7.65 – 7.57 (m, 3H), 7.34 (dd, *J* = 8.7, 2.1 Hz, 1H); <sup>13</sup>C NMR (101 MHz, DMSO-D<sub>6</sub>) δ 193.6, 188.4, 139.2, 135.5, 134.8, 132.8, 129.8, 129.2, 127.5, 126.2, 123.9, 120.3, 114.5, 112.1; HRMS calcd for C<sub>16</sub>H<sub>10</sub>ClNO<sub>2</sub>Na (M+Na)<sup>+</sup> 306.0292, found 306.0285.

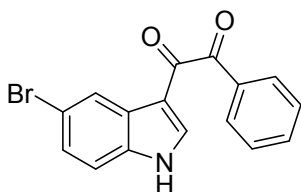

**1-(5-bromo-1H-indol-3-yl)-2-phenylethane-1,2-dione (4fa)**

<sup>1</sup>H NMR (400 MHz, DMSO-D<sub>6</sub>) δ 12.59 (s, 1H), 8.36 (d, *J* = 1.6 Hz, 1H), 8.25 (s, 1H), 7.97 (d, *J* = 7.3 Hz, 2H), 7.75 (t, *J* = 7.4 Hz, 1H), 7.60 (t, *J* = 7.7 Hz, 2H), 7.54 (d, *J* = 8.6 Hz, 1H), 7.46 (dd, *J* = 8.6, 1.9 Hz, 1H); <sup>13</sup>C NMR (101 MHz, DMSO-D<sub>6</sub>) δ 193.6, 188.4, 139.0, 135.8, 134.8, 132.8, 129.8, 129.2, 126.8, 126.5, 123.3, 115.6, 114.9, 112.0; HRMS calcd for C<sub>16</sub>H<sub>10</sub>BrNO<sub>2</sub>Na (M+Na)<sup>+</sup> 349.9787, found 349.9795.

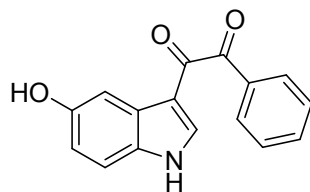

**1-(5-hydroxy-1H-indol-3-yl)-2-phenylethane-1,2-dione (4ga)**

Brown solid: m.p. 214-215 °C; IR (cm<sup>-1</sup>) 3239, 1653, 1626, 1593, 1517; <sup>1</sup>H NMR (400 MHz, DMSO-D<sub>6</sub>) δ 12.18 (s, 1H), 9.22 (s, 1H), 8.01 (d, *J* = 3.3 Hz, 1H), 7.98 – 7.91 (m, 2H), 7.77 – 7.70 (m, 1H), 7.59 (dd, *J* = 10.7, 4.8 Hz, 3H), 7.34 (d, *J* = 8.7 Hz, 1H), 6.79 (dd, *J* = 8.7, 2.4 Hz, 1H); <sup>13</sup>C NMR (101 MHz, DMSO-D<sub>6</sub>) δ 194.2, 188.2, 154.0, 137.5, 134.6, 133.1, 131.0, 129.7, 129.1, 126.2, 113.5, 113.2, 112.1, 105.6; HRMS calcd for C<sub>16</sub>H<sub>11</sub>NO<sub>3</sub>Na (M+Na)<sup>+</sup> 288.0631, found 288.0634.

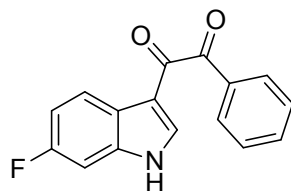

**1-(6-fluoro-1H-indol-3-yl)-2-phenylethane-1,2-dione (4ia)**

Yellow solid: m.p. 209-210 °C; IR (cm<sup>-1</sup>) 1660, 1608, 1593, 1519; <sup>1</sup>H NMR (400 MHz, DMSO-D<sub>6</sub>) δ 12.46 (s, 1H), 8.25 – 8.17 (m, 2H), 7.97 (d, *J* = 7.5 Hz, 2H), 7.75 (t, *J* = 7.4 Hz, 1H), 7.60 (t, *J* = 7.7 Hz, 2H), 7.36 (dd, *J* = 9.5, 2.1 Hz, 1H), 7.23 – 7.14 (m, 1H); <sup>13</sup>C NMR (101 MHz, DMSO-D<sub>6</sub>) δ 193.7, 188.5, 159.7 (d, *J* = 239.1 Hz), 138.7 (d, *J* = 1.7 Hz), 137.2 (d, *J* = 13.2 Hz), 134.7, 132.9, 129.8, 129.1, 122.4 (d, *J* = 10.6 Hz), 121.7, 112.5, 111.2 (d, *J* = 24.0 Hz), 99.2 (d, *J* = 26.0 Hz); HRMS calcd for C<sub>16</sub>H<sub>10</sub>FNO<sub>2</sub>Na (M+Na)<sup>+</sup> 290.0588, found 290.0595.

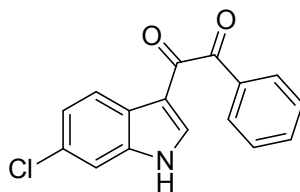

**1-(6-chloro-1H-indol-3-yl)-2-phenylethane-1,2-dione (4ja)**

Yellow solid: m.p. 232-233 °C; IR (cm<sup>-1</sup>) 1663, 1605, 1598, 1518; <sup>1</sup>H NMR (400 MHz, DMSO-D<sub>6</sub>) δ 12.50 (s, 1H), 8.28 – 8.16 (m, 2H), 7.97 (d, *J* = 7.4 Hz, 2H), 7.75 (t, *J* = 7.1 Hz, 1H), 7.65 – 7.55 (m, 3H), 7.34 (d, *J* = 8.2 Hz, 1H); <sup>13</sup>C NMR (101 MHz, DMSO) δ 193.7, 188.4, 138.9, 137.5, 134.8, 132.8, 129.8, 129.2, 128.3, 123.8, 123.1, 122.5, 112.5, 112.5; HRMS calcd for C<sub>16</sub>H<sub>10</sub>ClNO<sub>2</sub>Na (M+Na)<sup>+</sup> 306.0292, found 306.0295.



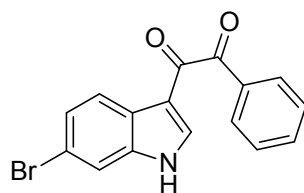

**1-(6-bromo-1H-indol-3-yl)-2-phenylethane-1,2-dione (4ka)**

Brown solid: m.p. 241-242 °C; IR (cm<sup>-1</sup>) 1664, 1605, 1574, 1516; <sup>1</sup>H NMR (400 MHz, DMSO-D<sub>6</sub>) δ 12.52 (s, 1H), 8.23 (s, 1H), 8.15 (d, *J* = 8.4 Hz, 1H), 7.96 (d, *J* = 7.5 Hz, 2H), 7.74 (d, *J* = 7.2 Hz, 2H), 7.60 (t, *J* = 7.6 Hz, 2H), 7.46 (dd, *J* = 8.4, 1.2 Hz, 1H); <sup>13</sup>C NMR (101 MHz, DMSO) δ 193.7, 188.5, 138.8, 137.9, 134.8, 132.8, 129.8, 129.2, 125.8, 124.1, 122.8, 116.4, 115.5, 112.5; HRMS calcd for C<sub>16</sub>H<sub>10</sub>BrNO<sub>2</sub>Na (M+Na)<sup>+</sup> 349.9787, found 349.9794.

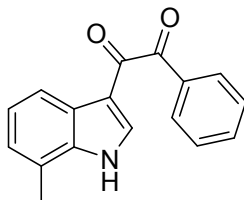

**1-(7-methyl-1H-indol-3-yl)-2-phenylethane-1,2-dione (4la)**

Orange solid: m.p. 186-187 °C; IR (cm<sup>-1</sup>) 1664, 1608, 1593, 1561; <sup>1</sup>H NMR (400 MHz, DMSO-D<sub>6</sub>) δ 12.47 (s, 1H), 8.17 (d, *J* = 3.3 Hz, 1H), 8.06 (d, *J* = 7.8 Hz, 1H), 8.01 – 7.93 (m, 2H), 7.74 (t, *J* = 7.2 Hz, 1H), 7.60 (t, *J* = 7.6 Hz, 2H), 7.22 (t, *J* = 7.5 Hz, 1H), 7.12 (d, *J* = 7.1 Hz, 1H), 2.53 (s, 3H); <sup>13</sup>C NMR (101 MHz, DMSO) δ 194.0, 188.6, 137.5, 136.4, 134.6, 133.0, 129.7, 129.1, 124.9, 124.4, 123.0, 122.2, 118.7, 113.0, 16.7; HRMS calcd for C<sub>17</sub>H<sub>13</sub>NO<sub>2</sub>Na (M+Na)<sup>+</sup> 286.0838, found 286.0844.

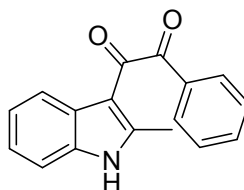

**1-(2-methyl-1H-indol-3-yl)-2-phenylethane-1,2-dione (4ma)**

<sup>1</sup>H NMR (400 MHz, Acetone-D<sub>6</sub>) δ 11.22 (s, 1H), 8.03 (d, *J* = 7.4 Hz, 2H), 7.98 (d, *J* = 7.4 Hz, 1H), 7.72 (d, *J* = 7.5 Hz, 1H), 7.60 (t, *J* = 7.7 Hz, 2H), 7.45 (d, *J* = 7.1 Hz, 1H), 7.22 – 7.15 (m, 2H), 2.58 (s, 3H); <sup>13</sup>C NMR (101 MHz, DMSO-D<sub>6</sub>) δ 196.0, 190.0, 148.3, 135.8, 135.4, 133.2, 130.0, 126.8, 123.4, 123.0, 120.4, 118.6, 112.3, 14.8; IR (cm<sup>-1</sup>): 1667, 1596; HRMS calcd for C<sub>17</sub>H<sub>13</sub>NO<sub>2</sub>Na (M+Na)<sup>+</sup> 286.0838, found 286.0842.

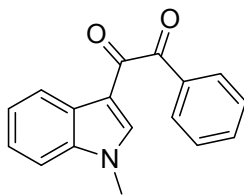

**1-(1-methyl-1H-indol-3-yl)-2-phenylethane-1,2-dione (4na)**

$^1\text{H}$  NMR (400 MHz,  $\text{CDCl}_3$ )  $\delta$  8.58 (d,  $J = 4.1$  Hz, 1H), 8.20 (d,  $J = 7.4$  Hz, 2H), 7.88 (s, 1H), 7.59 (t,  $J = 7.2$  Hz, 2H), 7.48 (s, 3H), 3.90 (s, 3H);  $^{13}\text{C}$  NMR (101 MHz,  $\text{CDCl}_3$ )  $\delta$  193.4, 187.3, 139.3, 137.4, 134.0, 133.1, 130.0, 128.4, 126.0, 123.9, 123.2, 122.4, 112.5, 109.7, 33.5; HRMS calcd for  $\text{C}_{17}\text{H}_{13}\text{NO}_2\text{Na}$  ( $\text{M}+\text{Na}$ ) $^+$  286.0838, found 286.0843.

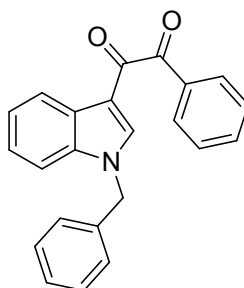

**1-(1-benzyl-1H-indol-3-yl)-2-phenylethane-1,2-dione (4oa)**

$^1\text{H}$  NMR (400 MHz,  $\text{CDCl}_3$ )  $\delta$  8.50 (d,  $J = 7.8$  Hz, 1H), 8.14 – 8.06 (m, 2H), 7.91 (s, 1H), 7.63 (t,  $J = 7.4$  Hz, 1H), 7.50 (t,  $J = 7.7$  Hz, 2H), 7.38 (ddd,  $J = 8.0, 5.8, 2.5$  Hz, 1H), 7.35 – 7.28 (m, 5H), 7.19 – 7.11 (m, 2H), 5.33 (s, 2H);  $^{13}\text{C}$  NMR (101 MHz,  $\text{CDCl}_3$ )  $\delta$  193.6, 187.7, 139.0, 137.3, 135.2, 134.4, 133.5, 130.4, 129.1, 128.8, 128.4, 127.1, 126.7, 124.4, 123.6, 122.8, 113.4, 110.7, 51.2; HRMS calcd for  $\text{C}_{23}\text{H}_{17}\text{NO}_2\text{Na}$  ( $\text{M}+\text{Na}$ ) $^+$  362.1151, found 362.1160.

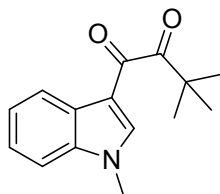

**3,3-dimethyl-1-(1-methyl-1H-indol-3-yl)butane-1,2-dione (5)**

Light yellow solid: m.p. 116-117  $^\circ\text{C}$ ; IR ( $\text{cm}^{-1}$ ) 1698, 1666, 1601, 1581;  $^1\text{H}$  NMR (400 MHz,  $\text{DMSO}-d_6$ )  $\delta$  8.16 (d,  $J = 7.2$  Hz, 1H), 8.08 (s, 1H), 7.59 (d,  $J = 8.0$  Hz, 1H), 7.38 – 7.28 (m, 2H), 3.89 (s, 3H), 1.27 (s, 9H);  $^{13}\text{C}$  NMR (101 MHz,  $\text{DMSO}$ )  $\delta$  209.9, 189.5, 140.7, 137.6, 125.4, 123.7, 123.0, 121.2, 111.1, 111.1, 42.0, 33.4, 26.2; HRMS calcd for  $\text{C}_{15}\text{H}_{17}\text{NO}_2\text{Na}$  ( $\text{M}+\text{Na}$ ) $^+$  266.1151, found 266.1149.

#### 4. $^1\text{H}$ and $^{13}\text{C}$ NMR Spectra of all new compounds

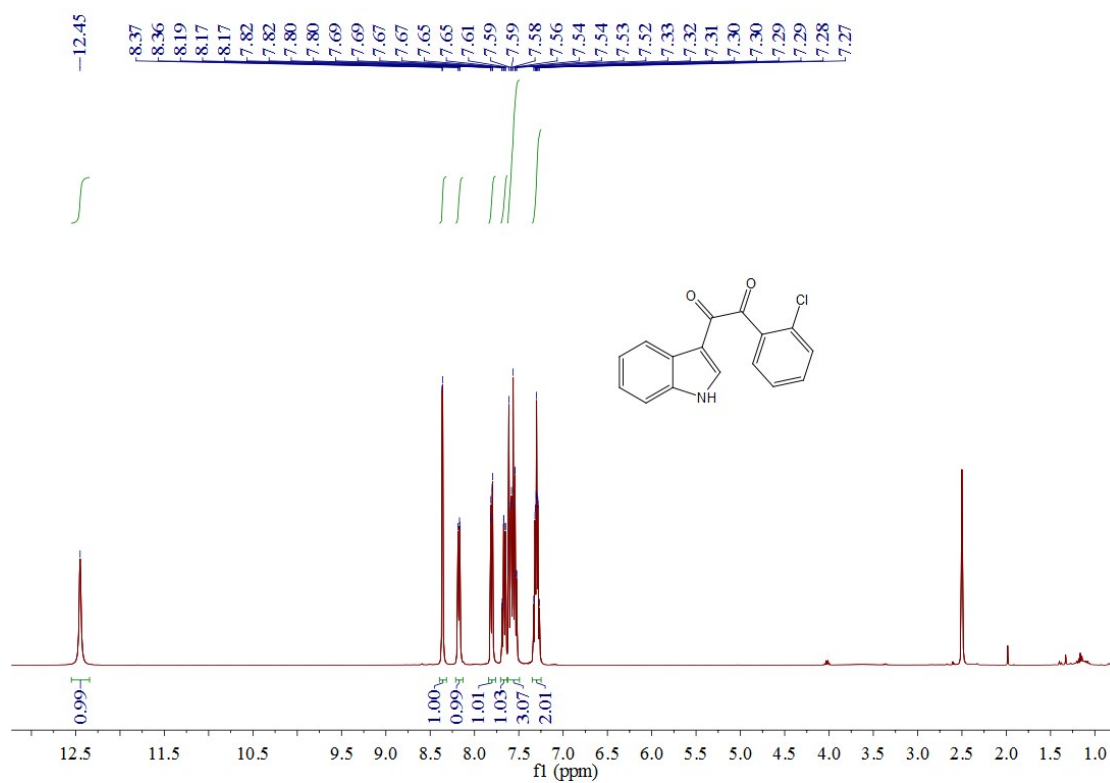

$^1\text{H}$  NMR spectrum of **3ab** in DMSO at 297 K ( $\delta$  in ppm).

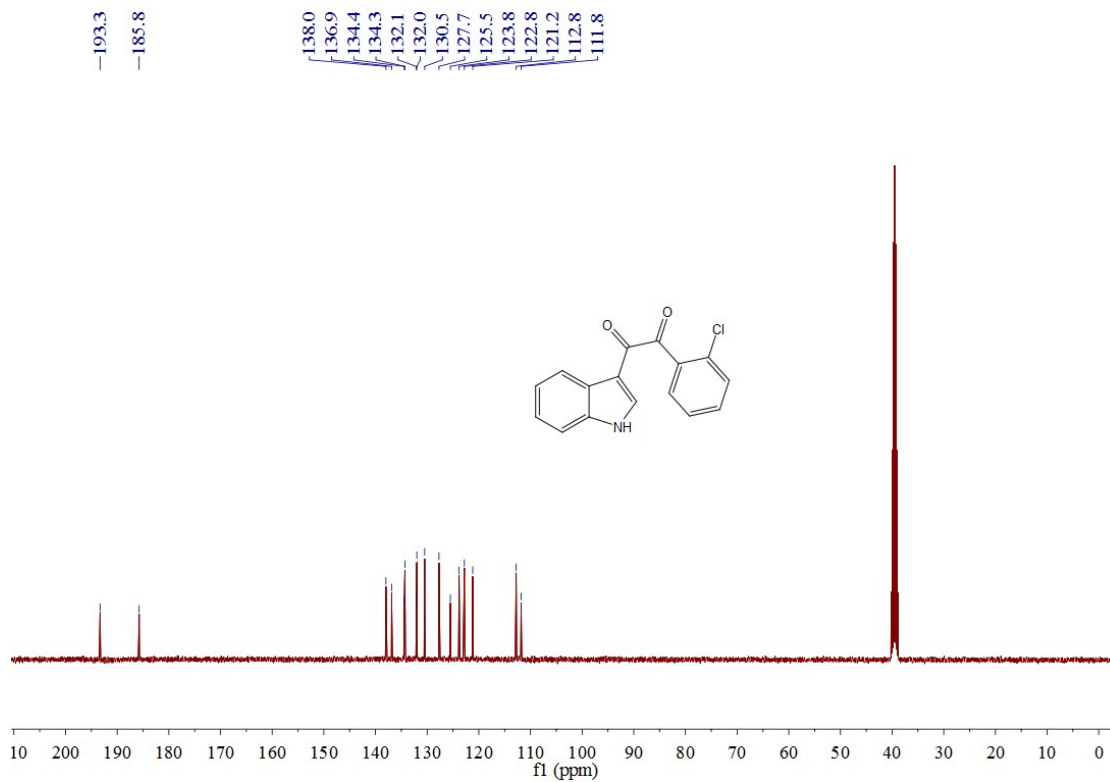

$^{13}\text{C}$  NMR spectrum of **3ab** in DMSO at 297 K ( $\delta$  in ppm).

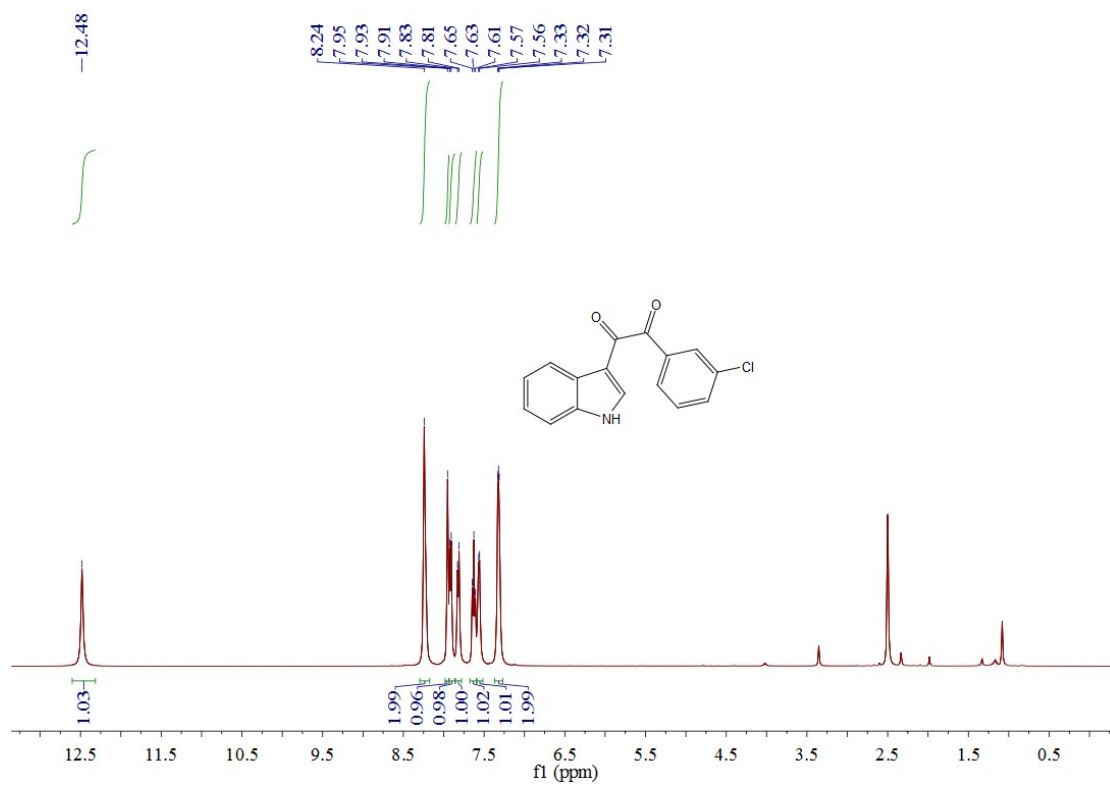

<sup>1</sup>H NMR spectrum of **3ac** in DMSO at 297 K (δ in ppm).

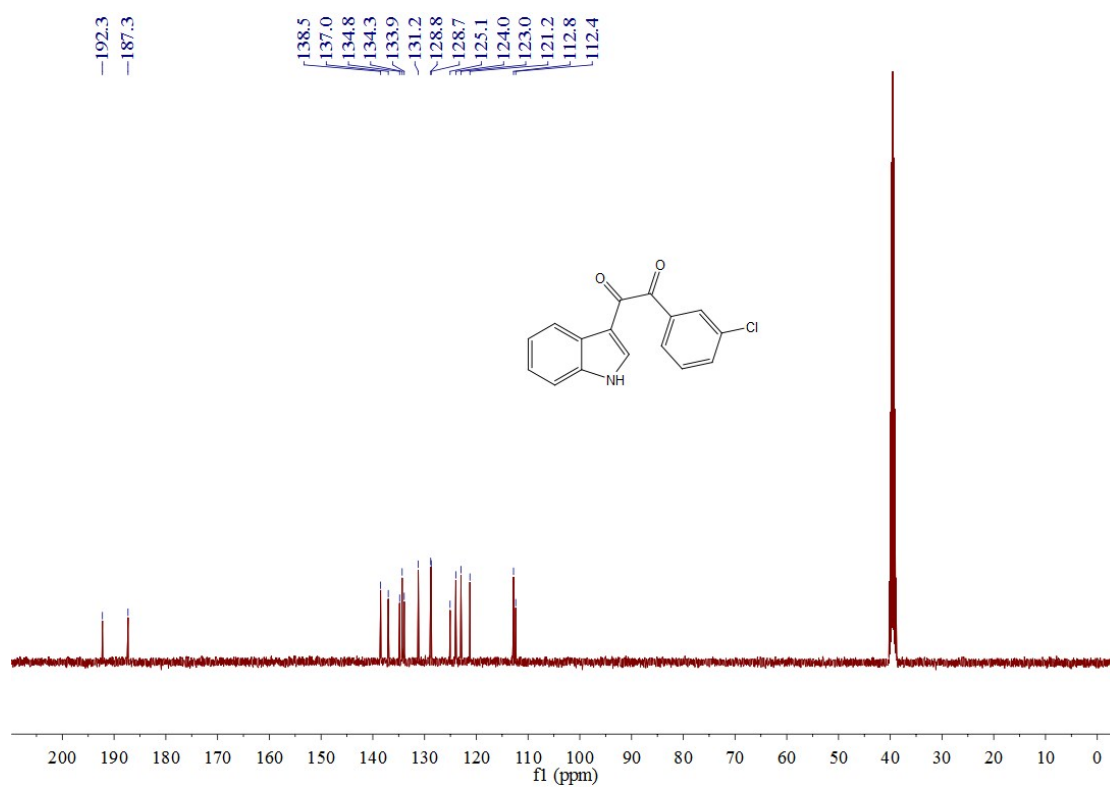

<sup>13</sup>C NMR spectrum of **3ac** in DMSO at 297 K (δ in ppm).

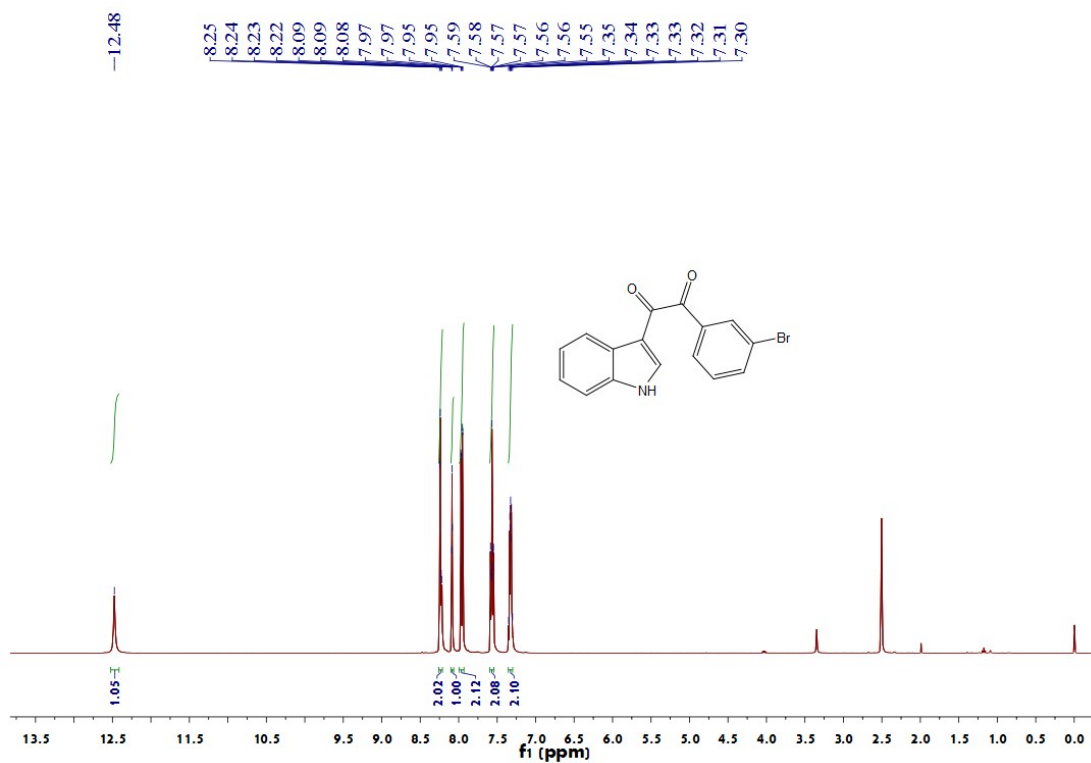

<sup>1</sup>H NMR spectrum of **3ah** in DMSO at 297 K (δ in ppm).

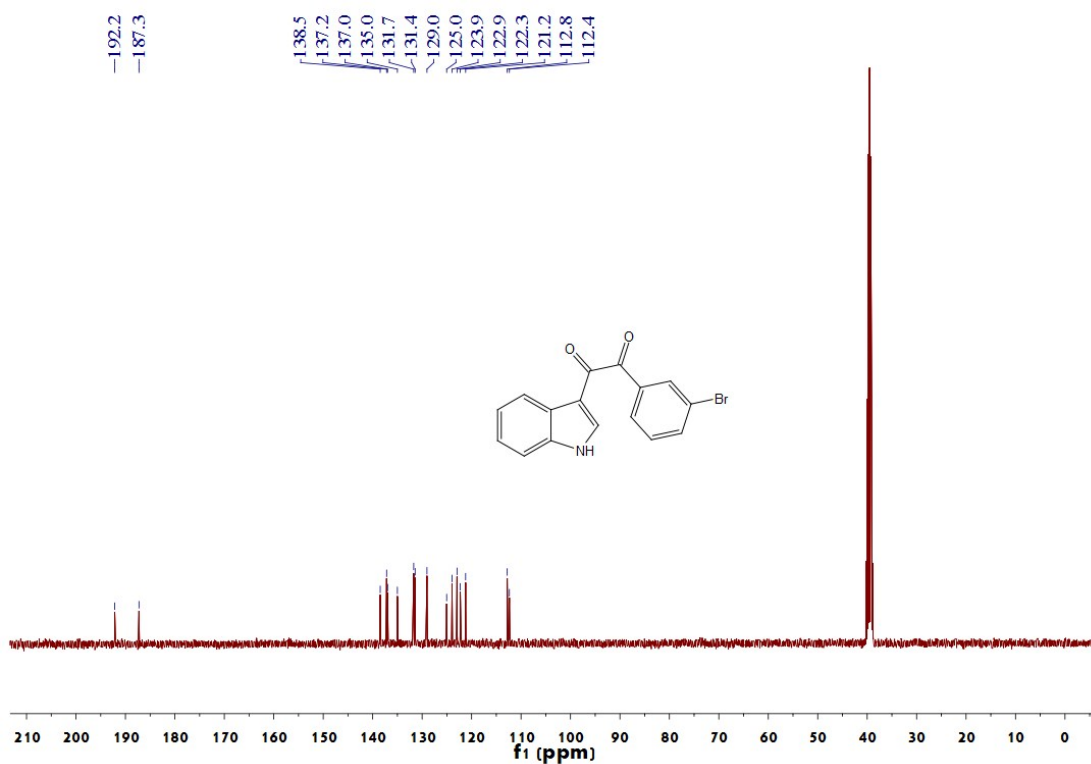

<sup>13</sup>C NMR spectrum of **3ah** in DMSO at 297 K (δ in ppm).

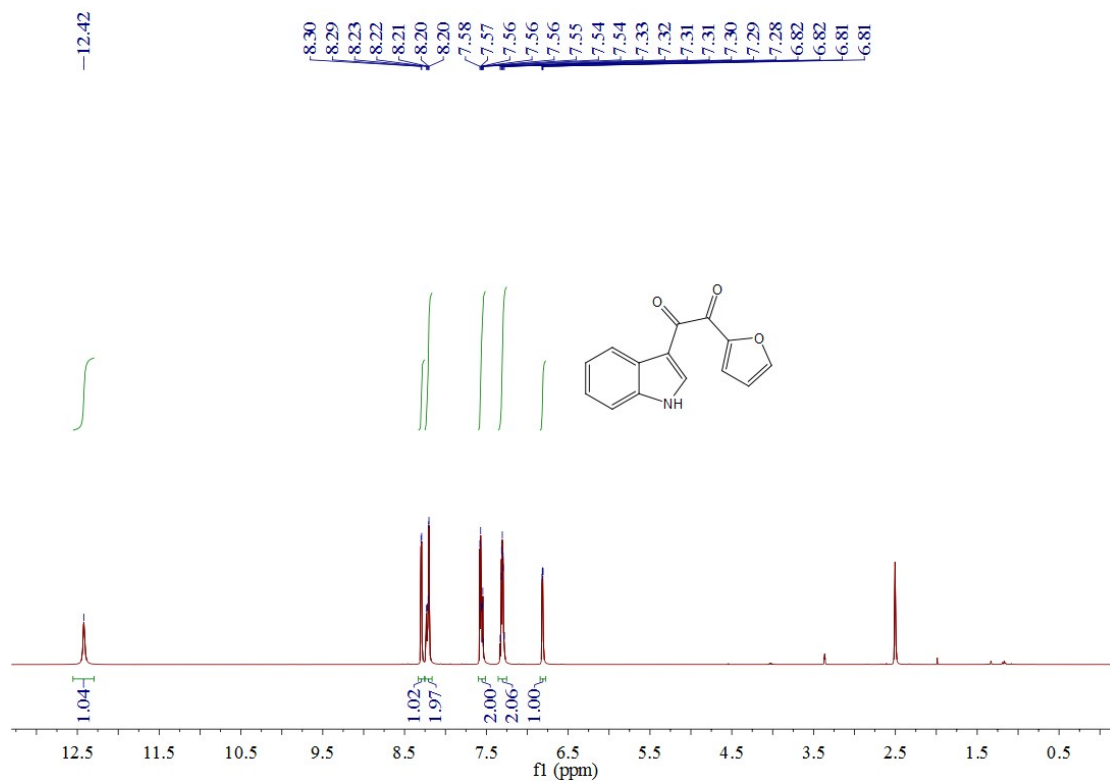

<sup>1</sup>H NMR spectrum of **3ai** in DMSO at 297 K (δ in ppm).

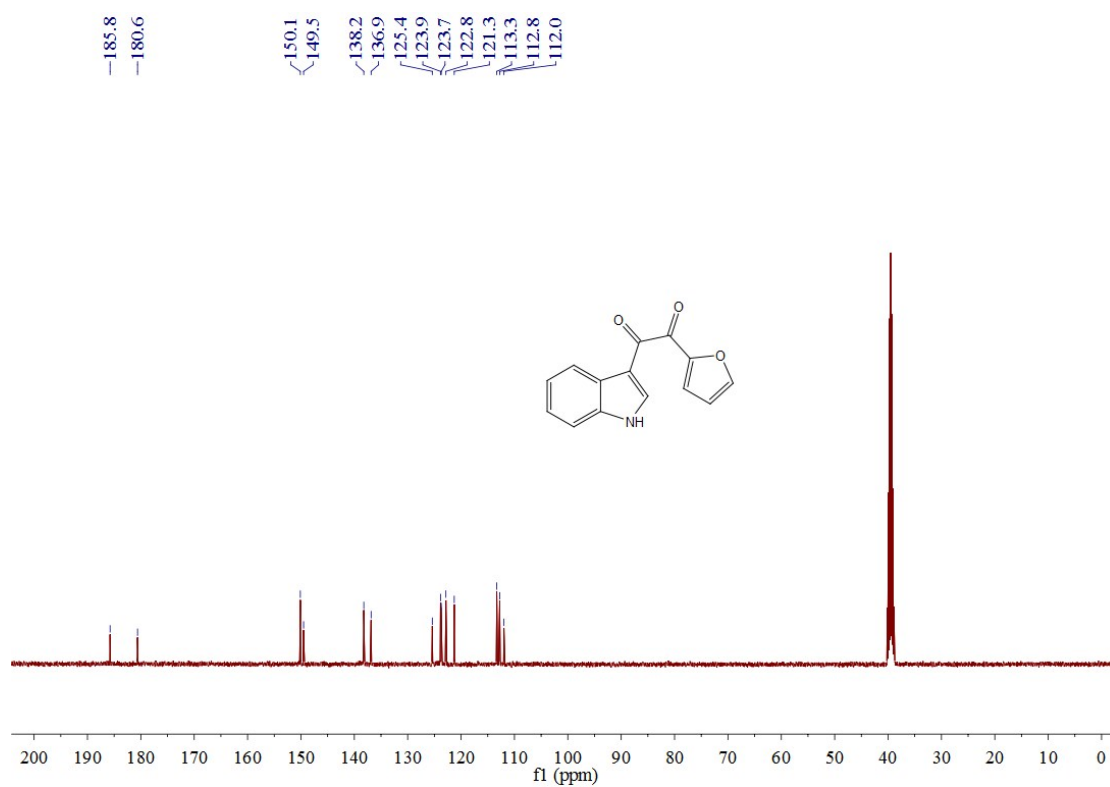

<sup>13</sup>C NMR spectrum of **3ai** in DMSO at 297 K (δ in ppm).

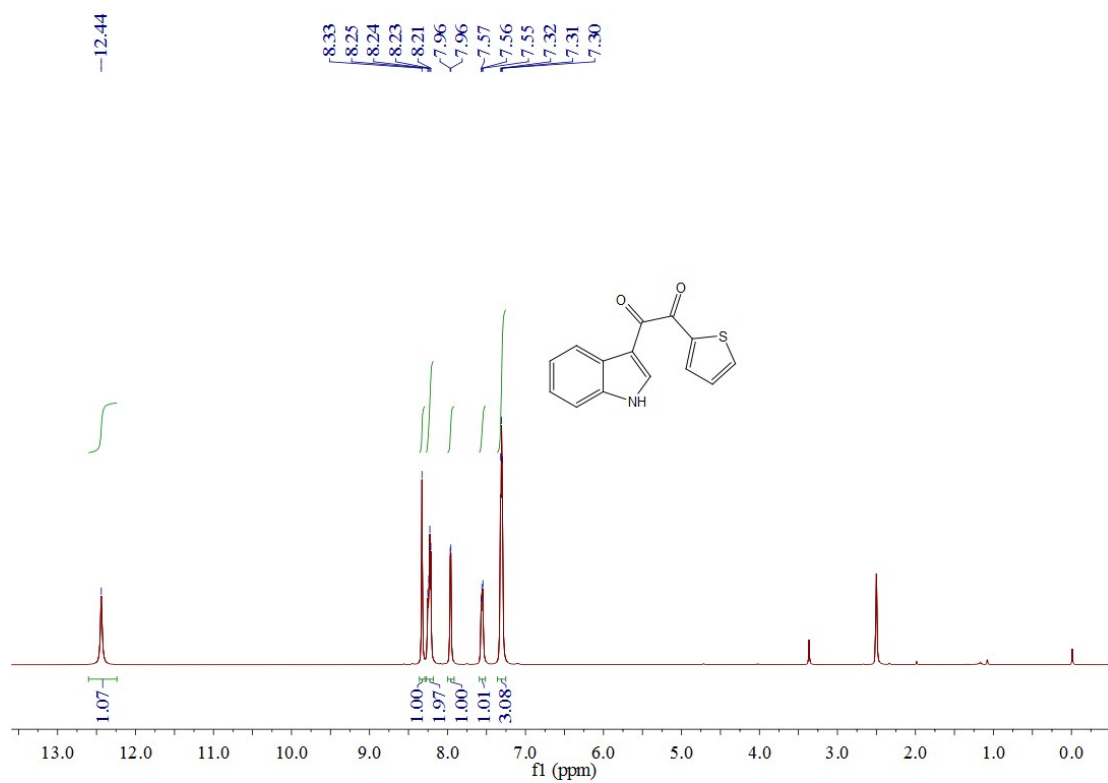

<sup>1</sup>H NMR spectrum of **3aj** in DMSO at 297 K (δ in ppm).

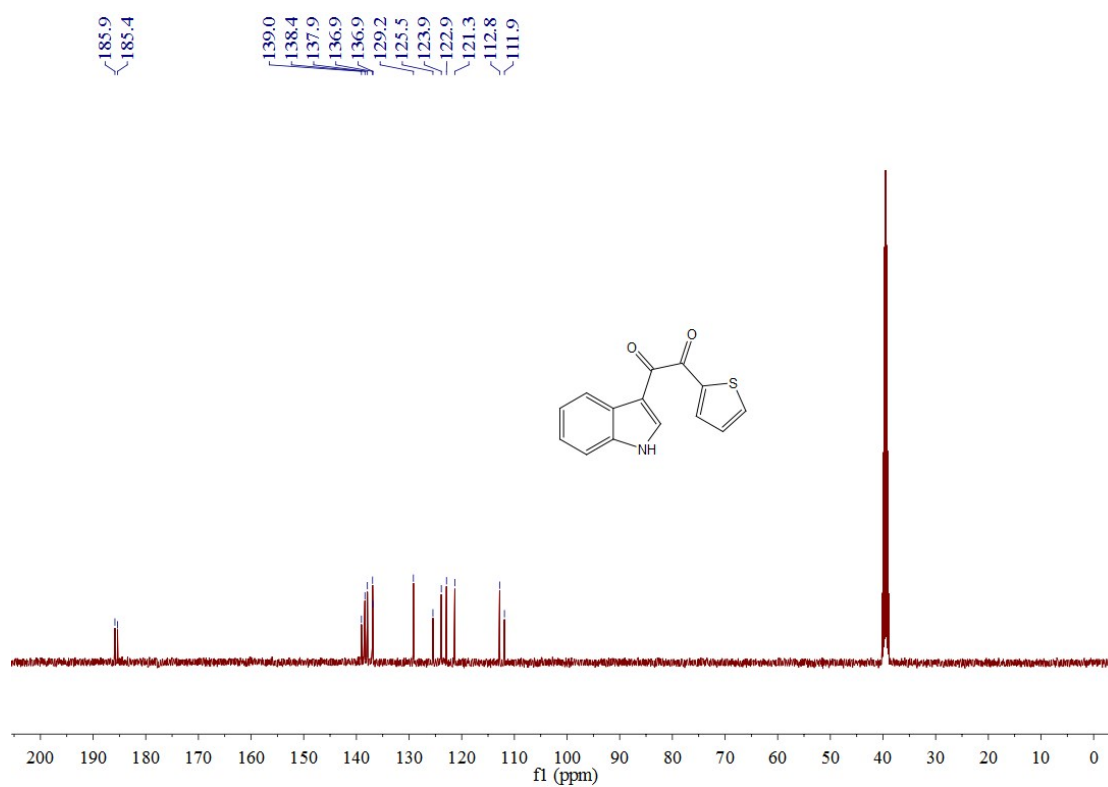

<sup>13</sup>C NMR spectrum of **3aj** in DMSO at 297 K (δ in ppm).

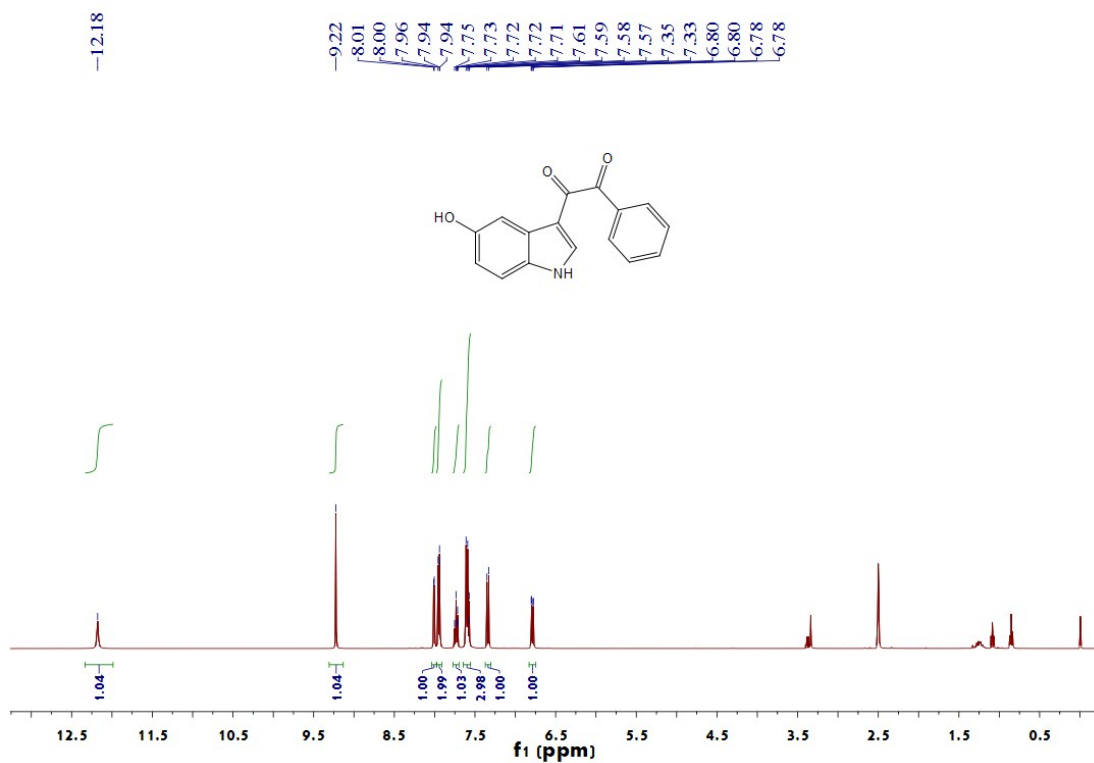

$^1\text{H}$  NMR spectrum of **4ga** in DMSO at 297 K ( $\delta$  in ppm).

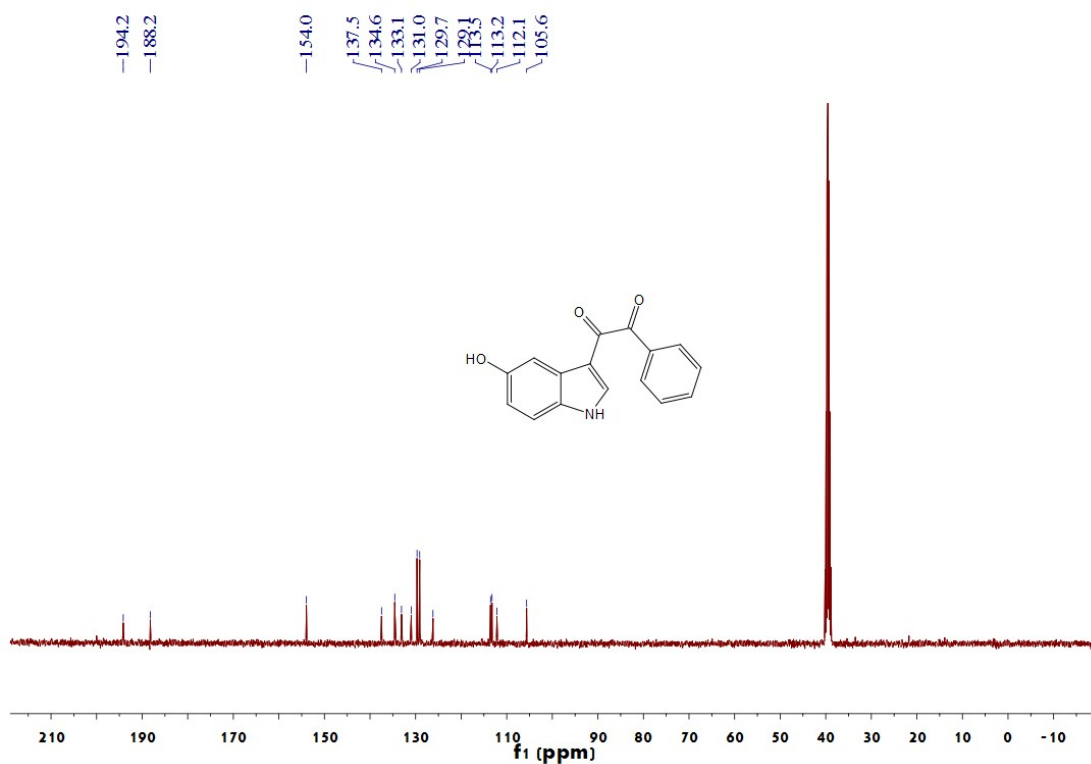

$^{13}\text{C}$  NMR spectrum of **4ga** in DMSO at 297 K ( $\delta$  in ppm).



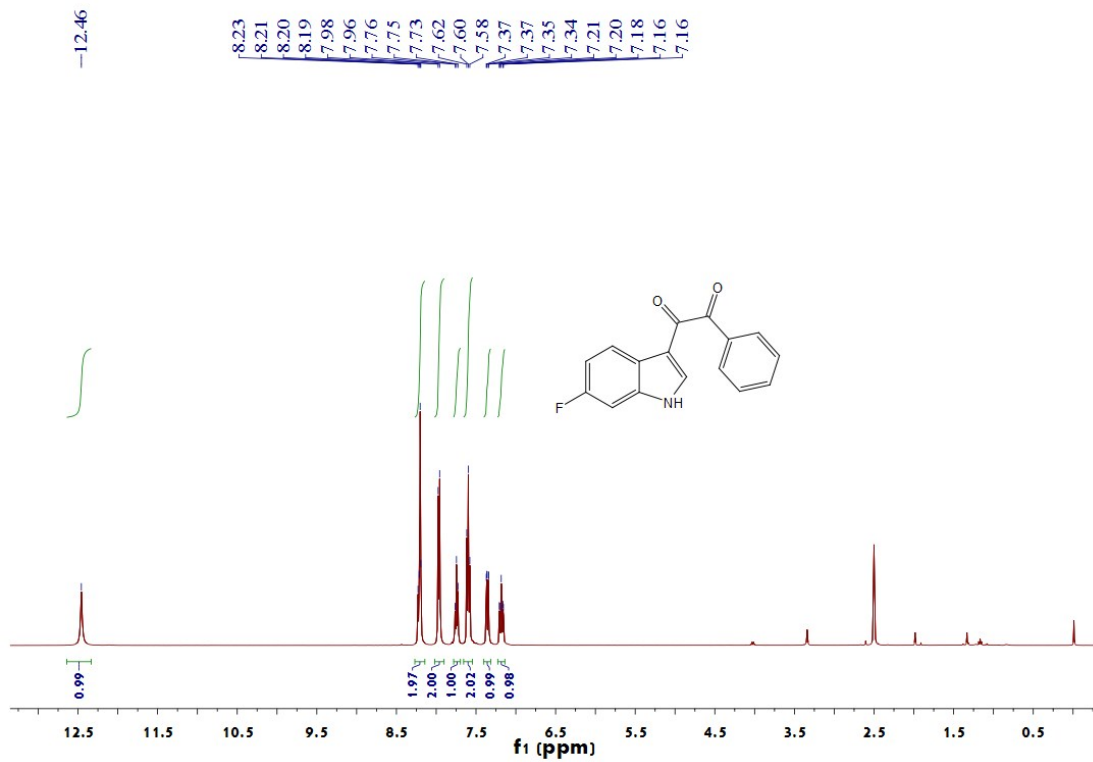

$^1\text{H}$  NMR spectrum of **4ia** in DMSO at 297 K ( $\delta$  in ppm).

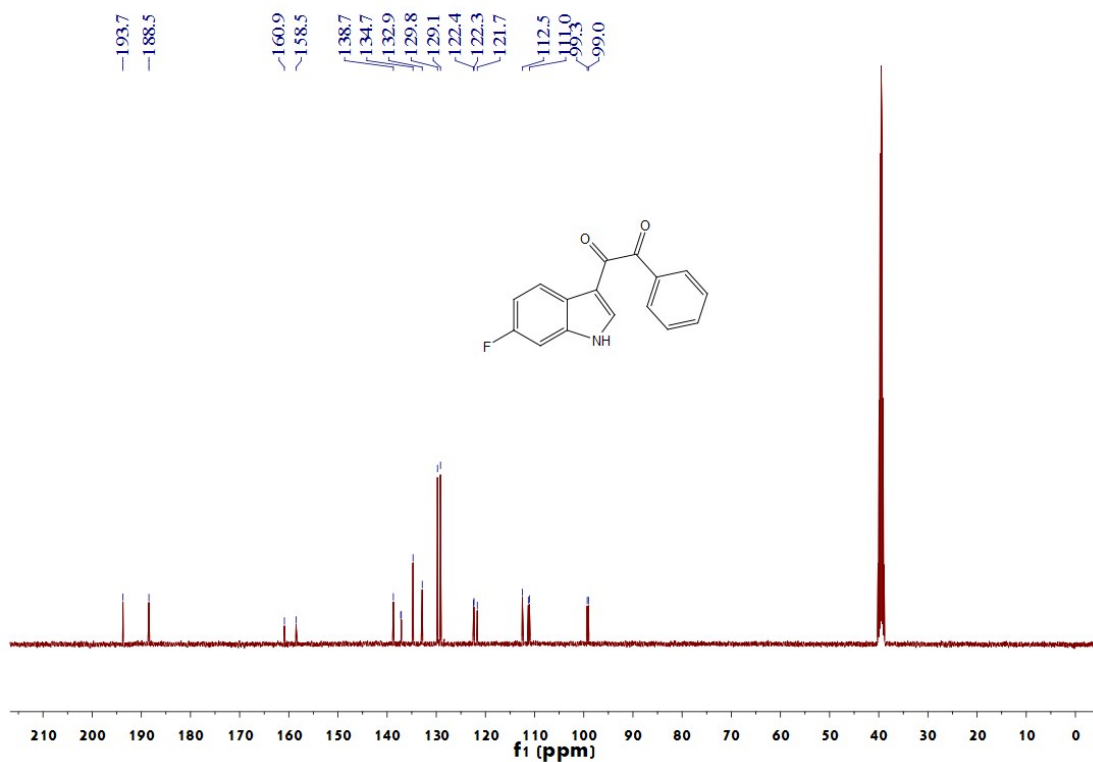

$^{13}\text{C}$  NMR spectrum of **4ia** in DMSO at 297 K ( $\delta$  in ppm).

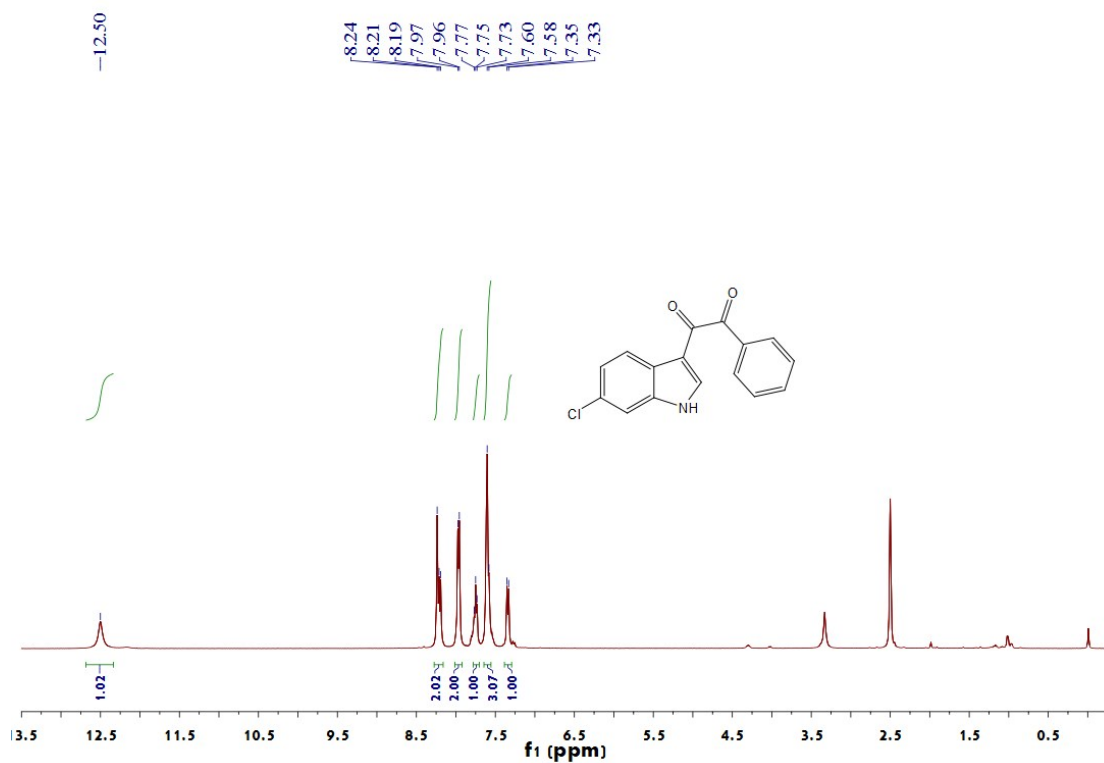

<sup>1</sup>H NMR spectrum of **4ja** in DMSO at 297 K (δ in ppm).

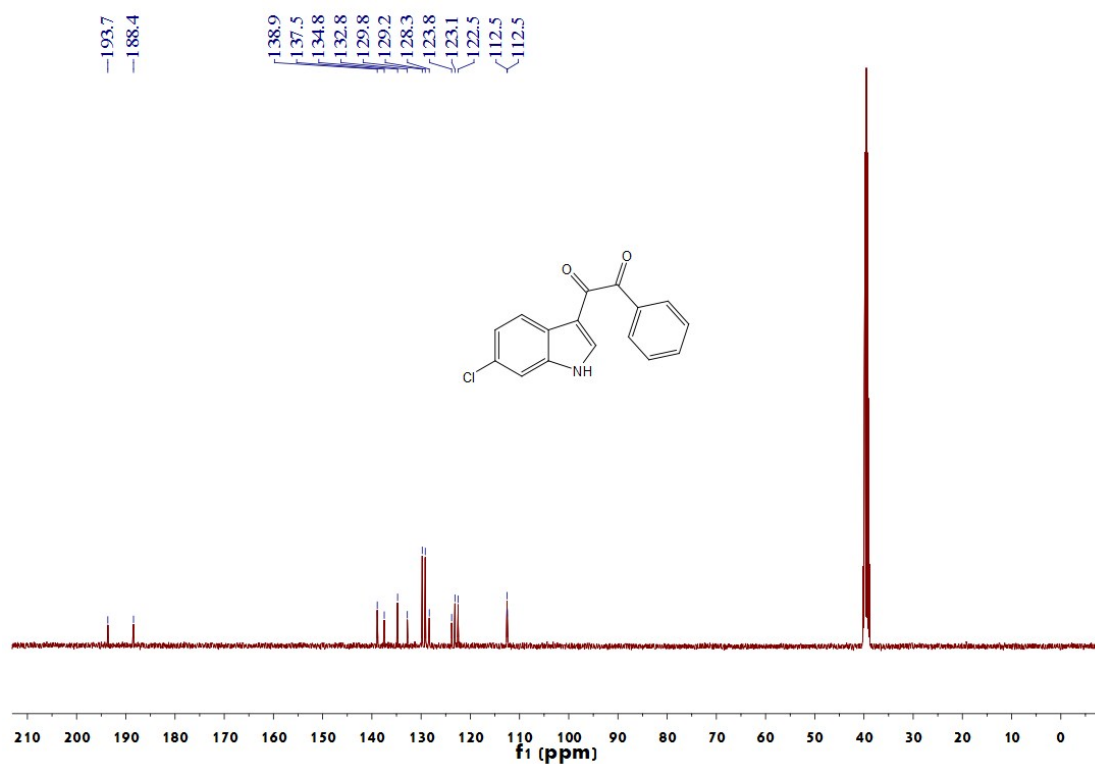

<sup>13</sup>C NMR spectrum of **4ja** in DMSO at 297 K (δ in ppm).

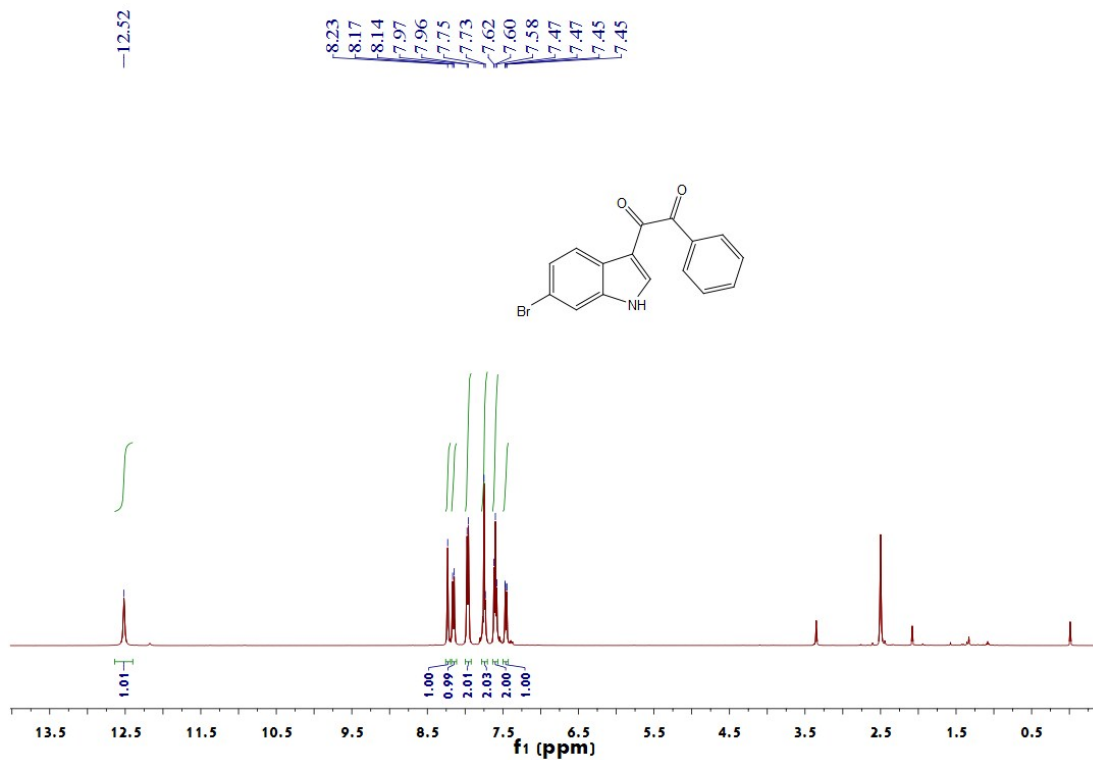

<sup>1</sup>H NMR spectrum of **4ka** in DMSO at 297 K (δ in ppm).

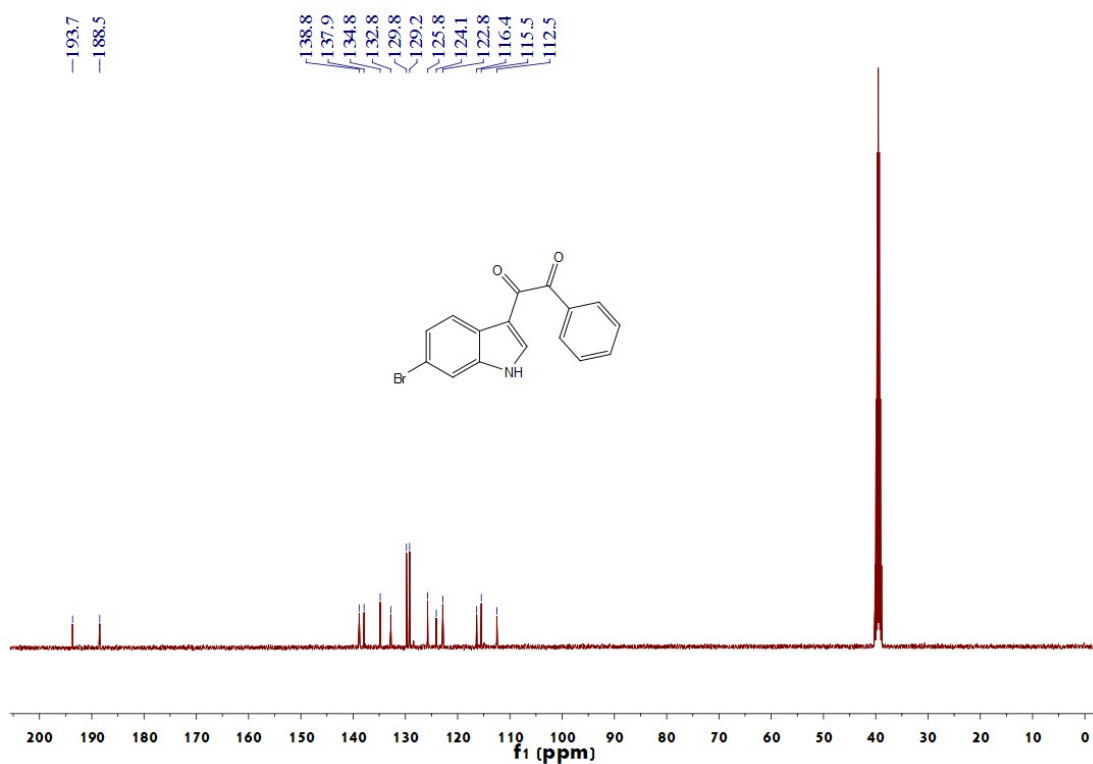

<sup>13</sup>C NMR spectrum of **4ka** in DMSO at 297 K (δ in ppm).

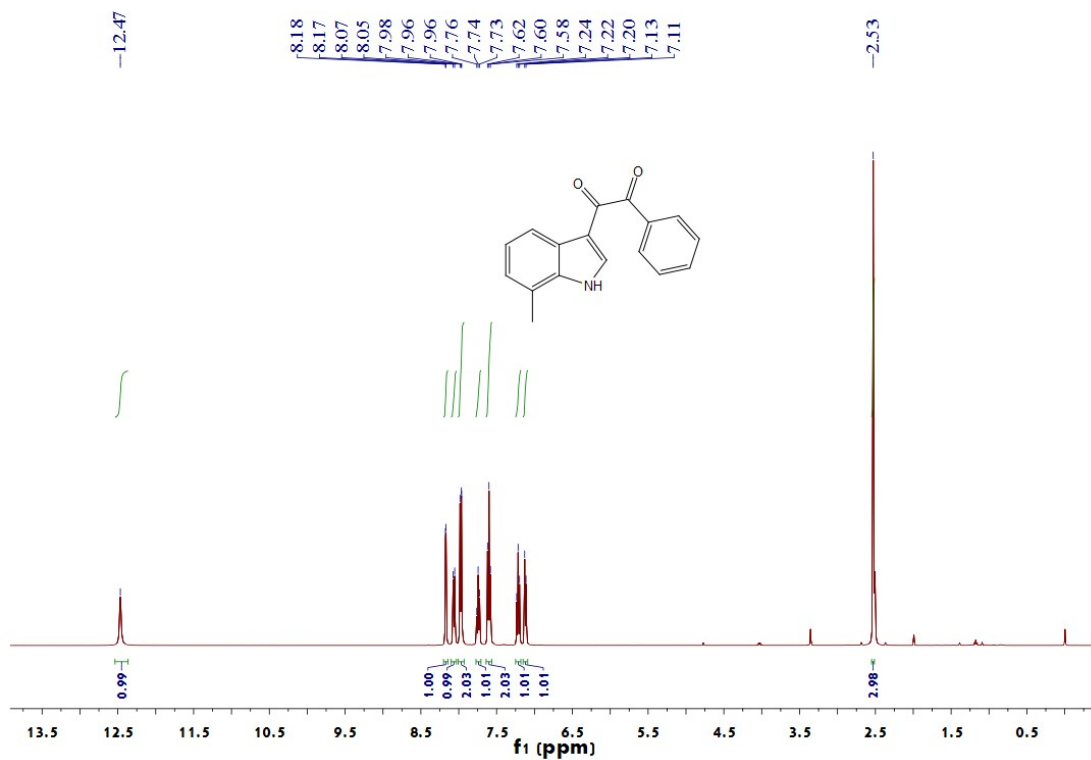

$^1\text{H}$  NMR spectrum of **4la** in DMSO at 297 K ( $\delta$  in ppm).

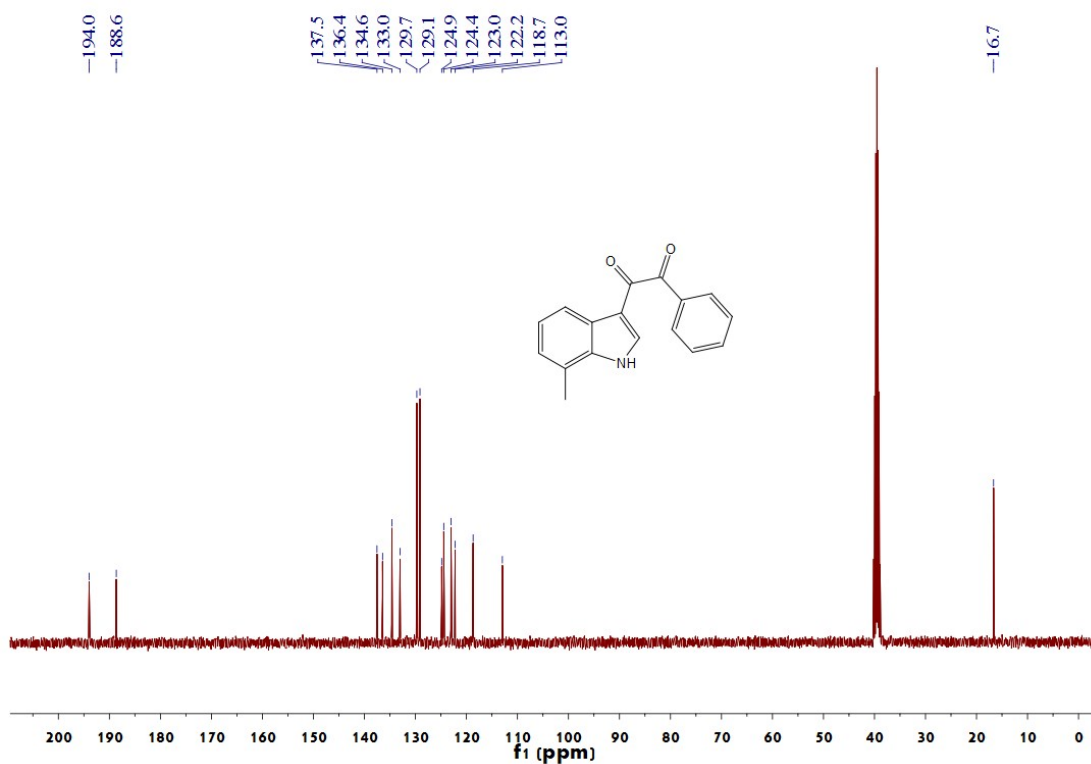

$^{13}\text{C}$  NMR spectrum of **4la** in DMSO at 297 K ( $\delta$  in ppm).

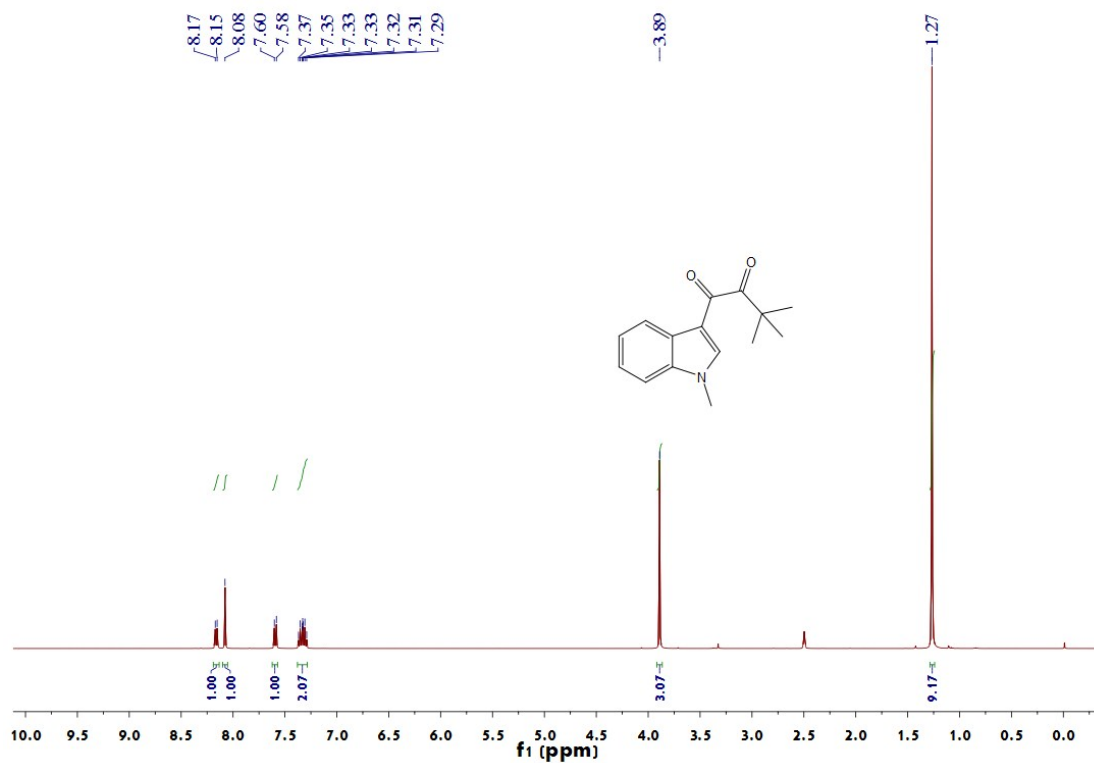

<sup>1</sup>H NMR spectrum of **5** in DMSO at 297 K (δ in ppm).

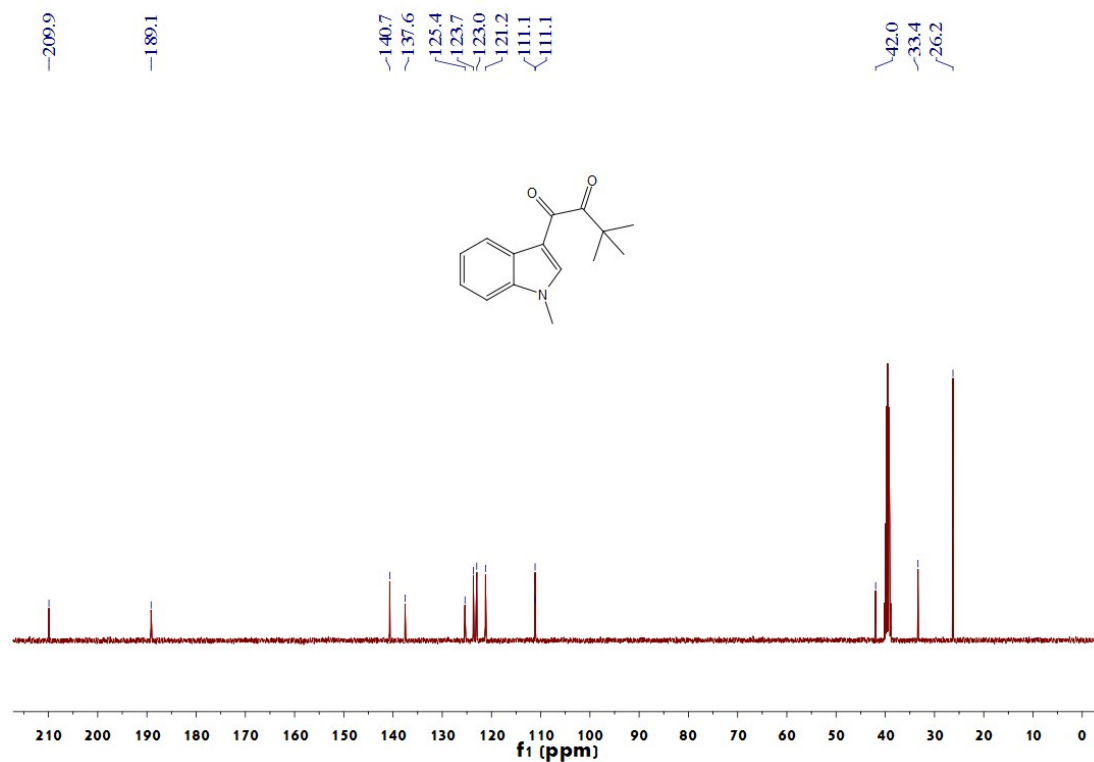

<sup>13</sup>C NMR spectrum of **5** in DMSO at 297 K (δ in ppm).
